# Supplementary material for: Controllable synthesis of nanotube-type graphitic C3N4 and their visible-light photocatalytic and fluorescent properties
Source: Royal Society of Chemistry journal article supplement (doi:10.1039/c3ta14576j), 2013-12-04
Supplement: c3ta14576j.pdf [file c3ta14576j.pdf]

Supporting Information

**Controllable Synthesis of Nanotube-type Graphitic C<sub>3</sub>N<sub>4</sub> and  
Their Visible-light Photocatalytic and Fluorescent Properties**

Shengping Wang, Changjiang Li, Tuo Wang, Peng Zhang, Ang Li, and Jinlong Gong\*

*Key Laboratory for Green Chemical Technology of Ministry of Education, School of  
Chemical Engineering and Technology, Tianjin University; Collaborative Innovation  
Center of Chemical Science and Engineering, Tianjin 300072, China.*

\*E-mail: [jlgong@tju.edu.cn](mailto:jlgong@tju.edu.cn); FAX: +86-22-87401818

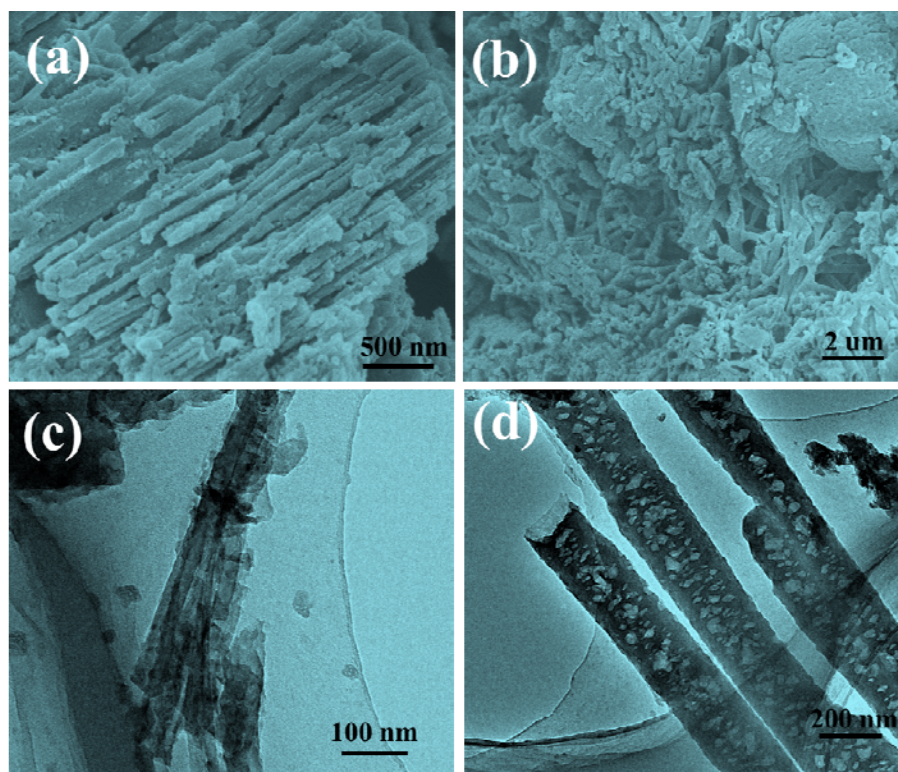

**Figure S1.** Panorama view of nanotube-type g-C<sub>3</sub>N<sub>4</sub>: (a) bulk phase; (b) surface parts; TEM images of nanotube-type g-C<sub>3</sub>N<sub>4</sub>: (c) formed in bulk phase; (d) formed on the surface.

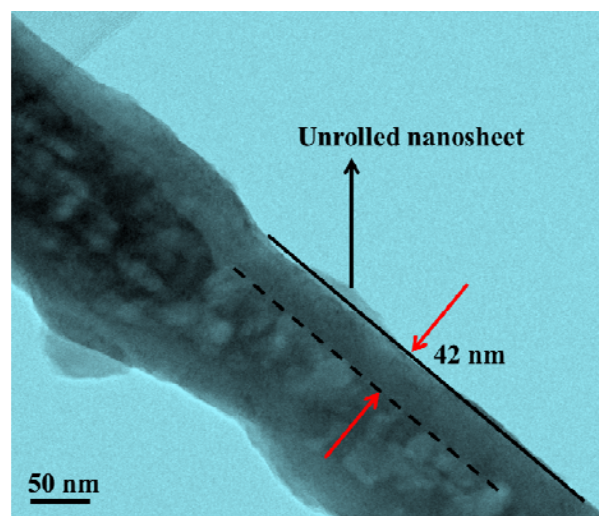

**Figure S2.** A magnified view of tube-like formed on the surfaces

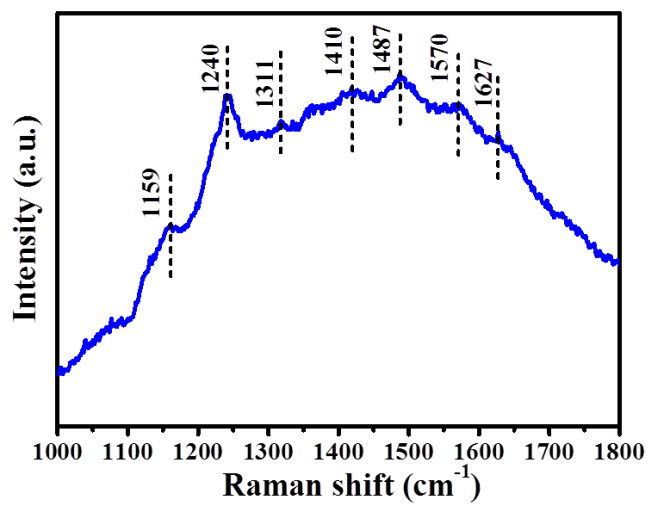

**Figure S3.** Raman spectrum of as-synthesized nanotube-type g-C<sub>3</sub>N<sub>4</sub>.

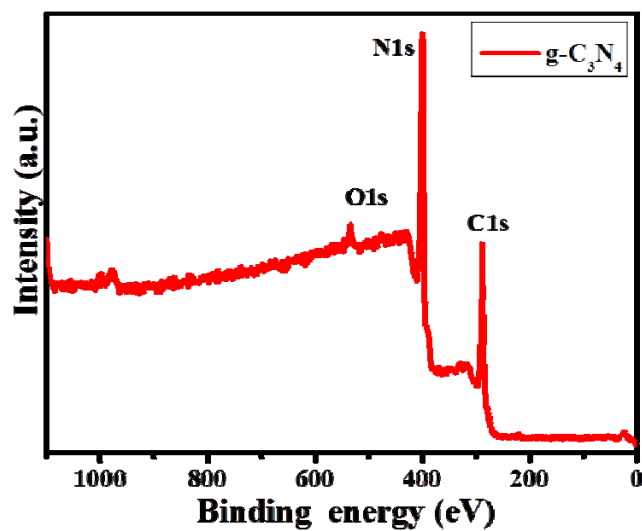

**Figure S4.** XPS spectrum of nanotube-type  $g\text{-C}_3\text{N}_4$ .

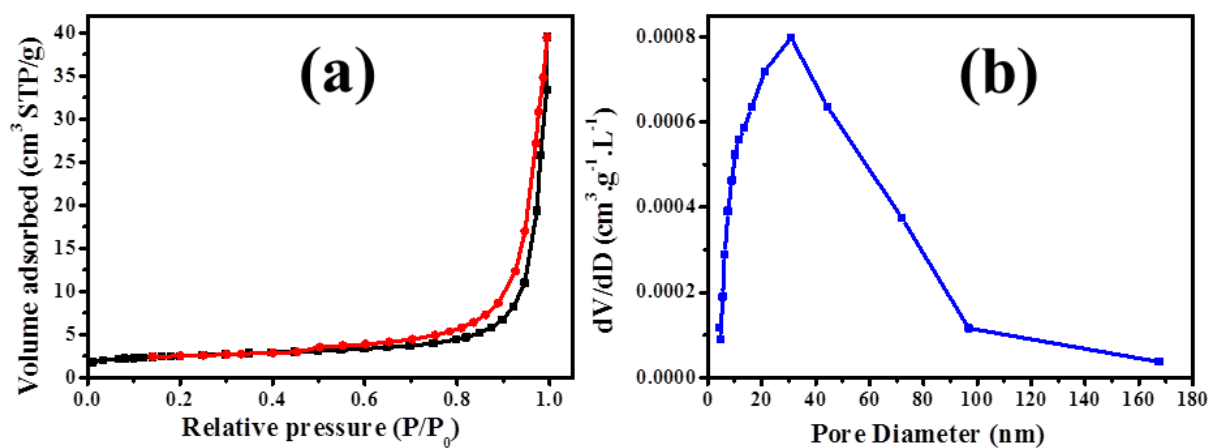

**Figure S5.** (a) Nitrogen adsorption-desorption isotherm; (b) the corresponding pore size distribution curve.

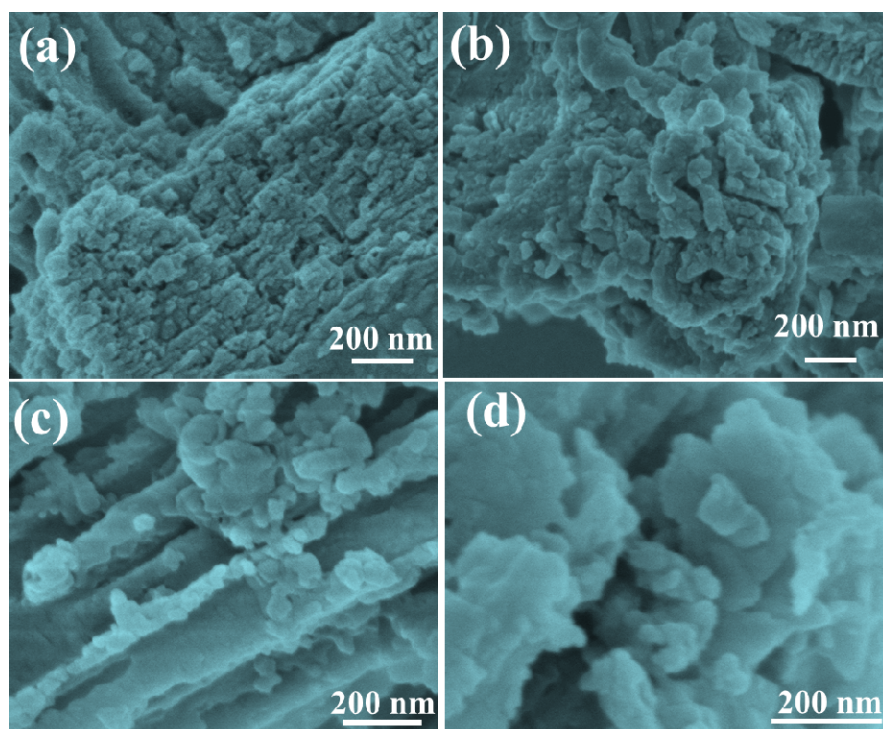

**Figure S6.** SEM images of g-C<sub>3</sub>N<sub>4</sub> samples with different packing compact degree: (a-b) loosely packed; (c-d) tightly packed

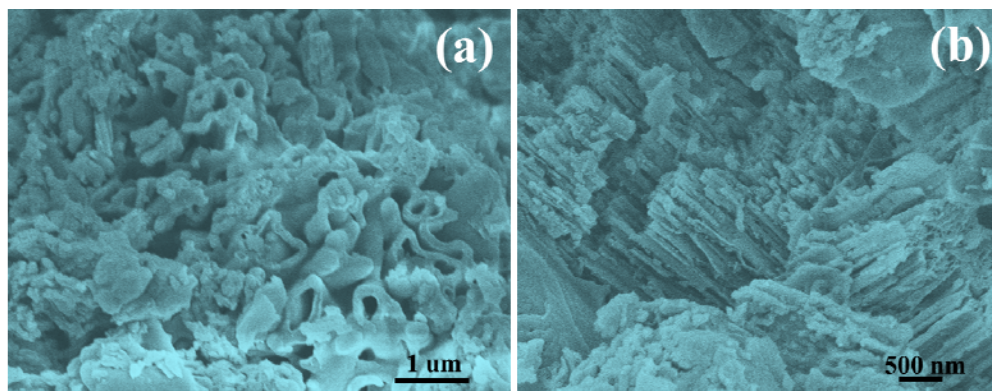

**Figure S7.** FE-SEM images of as-synthesized nanotube-type g-C<sub>3</sub>N<sub>4</sub> ultrasonic treated with water (a) surface parts; (b) bulk phase



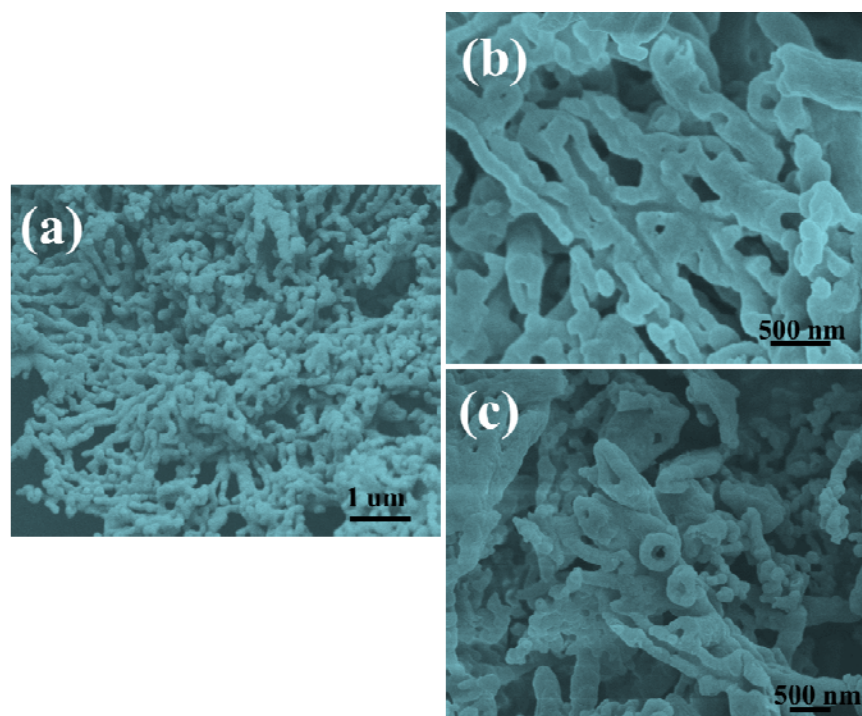

**Figure S8.** FE-SEM images of as-synthesized nanotube-type g-C<sub>3</sub>N<sub>4</sub> by pasting melamine syrup on the wall of crucible: (a) an overall view; (b-c) magnified views

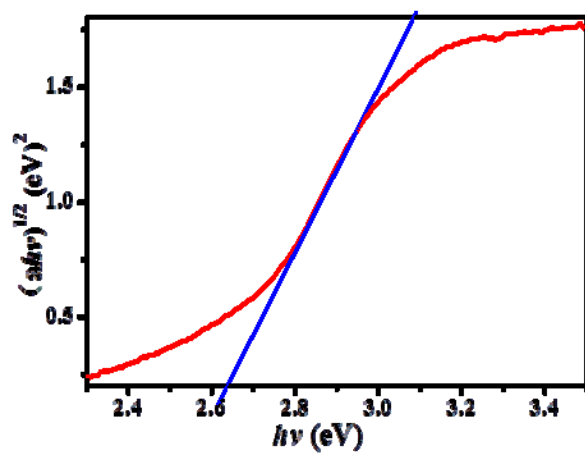

**Figure S9.** Tauc plot of as-synthesized nanotube-type g-C<sub>3</sub>N<sub>4</sub>.
